# Supplementary material
Source: PubMed Central journal article supplement (PMC5602384)

## SUPPORTING INFORMATION

**Fig S1: Pyruvate carboxylase is nonessential for tachyzoites regardless of glycolytic function.** (A) Scheme depicting deletion of the *TgPyC* gene by DHFR-TS via homologous crossover in tachyzoites. Indicated plasmid construct was transfected into either the RH $\Delta ku80$ -TaTi or in RH $\Delta ku80$ -TaTi- $\Delta tgg1$  strain followed by drug-selection and screening of the parasite clones using indicated primer pairs (*TgPyC*-KO-5'Scr-F1/R1; *TgPyC*-KO-3'Scr-F1/R1). The positive  $\Delta tgg1$  and  $\Delta tgg1/\Delta tgg1$  mutants were confirmed by sequencing of recombination-specific PCR amplicons. (B) Detection of *TgPyC* transcript in the  $\Delta tgg1$  and  $\Delta tgg1/\Delta tgg1$  mutants. A representative clone of each mutant was tested for the presence or absence of *TgPyC* and *TgFBP2* using ORF-specific primers. *TgFBP2* serves as a control to ascertain the integrity of RNA. The relevant parental strains (RH $\Delta ku80$ -TaTi or RH $\Delta ku80$ -TaTi- $\Delta tgg1$ ) were included as positive controls. (C) Growth of the  $\Delta tgg1$  and  $\Delta tgg1/\Delta tgg1$  mutants compared to their corresponding parental strains, as determined by plaque assay. Plaque area (arbitrary units) and plaque numbers represent the mean  $\pm$  SE of 3 assays. Note that growth defect in the  $\Delta tgg1$  and its derivative  $\Delta tgg1/\Delta tgg1$  strains are due to loss of the *TgGT1* gene.

**Fig S2: Toxoplasma harbors two distinct phosphoenolpyruvate carboxykinases.** (A) Multiple sequence alignment of the PEPCK domains from *T. gondii* with their orthologs from selected organisms. Alignment was made using BLAST and MUSCLE programs. Conserved residues are highlighted in colors. Note the sequence variation between ATP-dependent (*EcPEPCK*, *ScPEPCK*, *AtPEPCK*, *TgPEPCK1*, *TgPEPCK2*) and GTP-dependent homologs (*HsPEPCK-C*, *HsPEPCK-M*). (B) Primary structure of *TgPEPCK1* and *TgPEPCK2* protein. The predicted catalytic domain is shown as a black box with active sites annotated in light gray color. The mitochondrial target peptide (mTP) is shown in green. (C) Phylogenetic analysis of PEPCKs from distinct organisms. PEPCK sequences were clustered using CLC Sequence Viewer 7.7 and visualized by FigTree v1.4.2. The single most parsimonious tree of ATP-dependent PEPCK orthologs is shown. Circles on the branches denote bootstrap values for parsimony. *TgPEPCK1* and *TgPEPCK2* differ considerably from mammalian homologs, which are GTP-dependent and thus could not be parsimoniously grouped with ATP-dependent PEPCKs from bacteria, plants, fungi and parasites. Sequences for performing analysis were obtained from NCBI and parasite databases. NCBI accession: *TgPEPCK1* (*TgPEPCK<sub>mt</sub>*), KX785384; *TgPEPCK2* (*TgPEPCK<sub>net</sub>*), KX785385; *EcPEPCK*, P22259; *ScPEPCK*, P10963; *AtPEPCK*, Q9T074; *HsPEPCK-M*, Q16822; *HsPEPCK-C*, P35558. Organism Abbreviations: *Ab*, *Aeromonas bivalvium*; *At*, *Arabidopsis thaliana*; *Bb*, *Babesia bovis*; *Bi*, *Brucella inopinata*; *Br*, *Brassica rapa*; *Cr*, *Chlamydomonas reinhardtii*; *Cv*, *Chlorella variabilis*; *Ec*, *Escherichia coli*; *Em*, *Enterobacter massiliensis*; *Er*, *Eubacterium ramulus*; *Et*, *Eimeria tenella*; *Ga*, *Gossypium arboretum*; *Hh*, *Hammondia hammondi*; *Hs*, *Homo sapiens*; *Ia*, *Ignavibacterium album*; *Kp*, *Klebsiella pneumoniae*; *Kr*, *Ktedonobacter racemifer*; *Lb*, *Leptospira biflexa*; *Nc*, *Neospora caninum*; *Pf*, *Plasmodium falciparum*; *Pj*, *Pneumocystis jiroveci*; *Sa*, *Staphylococcus aureus*; *Sb*, *Salmonella bongori*; *Sc*, *Saccharomyces cerevisiae*; *Sl*, *Suillus luteus*; *Tg*, *Toxoplasma gondii*; *Tp*, *Theileria parva*; *Yp*, *Yersinia pestis*; *Zm*, *Zostera marina*

**Fig S3: *TgPEPCK<sub>net</sub>* is expendable in glycolysis-proficient and glycolysis-deficient parasites.** (A) Genetic deletion of *TgPEPCK<sub>net</sub>* by DHFR-TS in tachyzoites. A gene knockout construct allowing double homologous recombination at the *TgPEPCK<sub>net</sub>* locus was transfected into designated parental strains (RH $\Delta ku80$ -TaTi or RH $\Delta ku80$ -TaTi- $\Delta tgg1$ ). The clonal transgenic tachyzoites were obtained by drug selection and screened for 5' and 3' recombination events using pertinent primers (*TgPEPCK<sub>net</sub>*-KO-5'Scr-F1/R1 or *TgPEPCK<sub>net</sub>*-KO-3'Scr-F1/R1). The

positive clones ( $\Delta tgpepck_{net}$  and  $\Delta tggt1/\Delta tgpepck_{net}$  strains) were confirmed by sequencing of recombination-specific amplicons. **(B)** Detection of  $TgPEPCK_{net}$  transcript in the  $\Delta tgpepck_{net}$  and  $\Delta tggt1/\Delta tgpepck_{net}$  strains. Each strain was tested for the expression of  $TgPEPCK_{net}$  and  $TgFBP2$  (control for RNA integrity) using ORF-specific primers. **(C)** Plaque assays showing relative growth of the  $\Delta tgpepck_{net}$  and  $\Delta tggt1/\Delta tgpepck_{net}$  mutants with respect to analogous ancestral strains. Plaques formed by individual strains were evaluated for their area (arbitrary units) and numbers (mean  $\pm$  SE, n=3 assays). Note a somewhat slower growth (30% defect) of the two strains lacking  $TgGT1$  expression.

**Fig S4:** *Metabolites of gluconeogenesis are reduced upon knockdown of  $TgPEPCK_{mt}$  in the  $\Delta tggt1$  mutant.* Summed intensities of all isotopomers after isotopic abundance correction of metabolites associated with gluconeogenesis **(A)** and TCA cycle **(B)** are presented as a comparative measurement of abundance. Tachyzoites of the  $\Delta tggt1/\Delta tgpepck_{mt}$  strain were subjected to metabolomics analyses as stated in *methods*. PEP, phosphoenolpyruvate; Pyr, pyruvate; 3PG, 3-phosphoglyceraldehyde; G3P, glycerol 3-phosphate; G6P, glucose 6-phosphate; R5P, ribose 5-phosphate; Glu, glutamate; 2OG, 2-oxoglutarate; Suc, succinate, Fum, fumarate; Mal, malate; Cit, citrate.

**Fig S5:** *Supplementation with additional serine and glycine can partly restore off-state growth of the  $\Delta tggt1/\Delta tgpepck_{mt}$  mutant.* Plaque assays were performed in standard culture medium containing either the normal amounts of serine and glycine (100  $\mu$ M each) or supplemented with additional amounts of both amino acids (2 mM each). Tachyzoites treated with ATc were precultured for 2 passages with the drug. Shown are the mean plaque area (arbitrary units) with SEM from 3 independent assays. No effect of nutrient supplementation was observed when  $TgPEPCK_{mt}$  is expressed (-ATc). Significance was measured separately for each group (+ or - Ser/Gly) using student's *t*-test (\*\*,  $p < 0.01$ ).

**Table S1: Oligonucleotides used in this study**

| Primer name<br>(Restriction site)                             | Primer sequence<br>(Restriction site underlined)                           | Purpose<br>(Plasmid name)                                              |
|---------------------------------------------------------------|----------------------------------------------------------------------------|------------------------------------------------------------------------|
| <b>TgPyC</b>                                                  |                                                                            |                                                                        |
| <i>TgPyC</i> -ORF-F1 ( <i>Nsi</i> I)                          | CTCAT <u>CATGCAT</u> ATGATCATGGCACCTCTGACT                                 | Ectopic overexpression<br>( <i>pTgGRA2-UPKO</i> )                      |
| <i>TgPyC</i> -ORF-HA-R1 ( <i>Pac</i> I)                       | CTCATCTTAATTA <u>ACTAAGCGTAATCTGGAACATCGTATGGGTATAGAATGCGGACTAGCAAGTCA</u> |                                                                        |
| <i>TgPyC</i> -KO-5'UTR-F1 ( <i>Apa</i> I)                     | CTCAT <u>CGGGCCCT</u> GTA <u>CTGAGACAGCAAA</u> CGAAAA                      | Cloning of 5'UTR for the gene knockout ( <i>pKO-DHFR-TS</i> )          |
| <i>TgPyC</i> -KO-5'UTR-R1 ( <i>Apa</i> I)                     | CTCAT <u>CGGGCCCT</u> TCAACGCTACATGACACGC                                  |                                                                        |
| <i>TgPyC</i> -KO-3'UTR-F1 ( <i>Spe</i> I)                     | CTCAT <u>CACTAGTTAGAGCAGCGATTCAAGGACA</u>                                  | Cloning of 3'UTR for the gene knockout ( <i>pKO-DHFR-TS</i> )          |
| <i>TgPyC</i> -KO-3'UTR-R1 ( <i>Not</i> I)                     | CTCAT <u>CGCGGCCGCT</u> TAATACAAGAACACGGTGATCCA                            |                                                                        |
| <i>TgPyC</i> -KO-5'Scr-F1                                     | TACGACGCAGGGCAAATC                                                         | Screening of 5' recombination at the gene locus ( <i>pDrive</i> )      |
| <i>TgPyC</i> -KO-5'Scr-R1                                     | ATCGAGTAAGCACACTACTCCACG                                                   |                                                                        |
| <i>TgPyC</i> -KO-3'Scr-F1                                     | GGGATCAGGGAGAGTGCC                                                         | Screening of 3' recombination at the gene locus ( <i>pDrive</i> )      |
| <i>TgPyC</i> -KO-3'Scr-R1                                     | TATATTCTTTCACAGTTGTTTCTCCG                                                 |                                                                        |
| <i>TgPyC</i> -3'IT-COS-F1 ( <i>Hpa</i> I)                     | CTCAT <u>CGTTAACTTTATCTTCGGTCCCTGAGTTTC</u>                                | Cloning of crossover sequence for 3'HA tagging ( <i>p3'IT-HXGPRT</i> ) |
| <i>TgPyC</i> -3'IT-COS-HA-R1 ( <i>Eco</i> RI)                 | CTCAT <u>CGAATTCCTAAGCGTAATCTGGAACATCGTATGGTATAGAATGCGGACTAGCAAGTCA</u>    |                                                                        |
| <i>TgPyC</i> -3'IT-Scr-F1                                     | GAAAACTTCGGAGATGTTTCG                                                      | Screening of 3' crossover at the gene locus ( <i>pDrive</i> )          |
| <i>TgPyC</i> -3'IT-Scr-R1                                     | CTGATCGGCTTTGTAGACTTCTC                                                    |                                                                        |
| <b>TgPEPCK<sub>net</sub></b>                                  |                                                                            |                                                                        |
| <i>TgPEPCK<sub>net</sub></i> -KO-5'UTR-F1 ( <i>Apa</i> I)     | CTCAT <u>CGGGCCCGCTACGGATTGATGATATGATCC</u>                                | Cloning of 5'UTR for the gene knockout ( <i>pKO-DHFR-TS</i> )          |
| <i>TgPEPCK<sub>net</sub></i> -KO-5'UTR-R1 ( <i>Apa</i> I)     | CTCAT <u>CGGGCCCT</u> TCGGGAACATGCTACGG                                    |                                                                        |
| <i>TgPEPCK<sub>net</sub></i> -KO-3'UTR-F1 ( <i>Spe</i> I)     | CTCAT <u>CACTAGTAGAGGGCGTTTGAGTGATAGG</u>                                  | Cloning of 3'UTR for the gene knockout ( <i>pKO-DHFR-TS</i> )          |
| <i>TgPEPCK<sub>net</sub></i> -KO-3'UTR-R1 ( <i>Not</i> I)     | CTCAT <u>CGCGGCCG</u> CAGACAAAAGAAGGAGGGCC                                 |                                                                        |
| <i>TgPEPCK<sub>net</sub></i> -KO-5'Scr-F1                     | CCTTCAGTGCAGTGTCTGT                                                        | Screening of 5' recombination at the gene locus ( <i>pDrive</i> )      |
| <i>TgPEPCK<sub>net</sub></i> -KO-5'Scr-R1                     | ATCGAGTAAGCACACTACTCCACG                                                   |                                                                        |
| <i>TgPEPCK<sub>net</sub></i> -KO-3'Scr-F1                     | GGGATCAGGGAGAGTGCC                                                         | Screening of 3' recombination at the gene locus ( <i>pDrive</i> )      |
| <i>TgPEPCK<sub>net</sub></i> -KO-3'Scr-R1                     | ATGCCATAGCGGTAGTCAC                                                        |                                                                        |
| <i>TgPEPCK<sub>net</sub></i> -3'IT-COS-F1 ( <i>Hpa</i> I)     | CTCAT <u>CGTTAACTCTGATTGTATTGCATGCCTG</u>                                  | Cloning of crossover sequence for 3'HA tagging ( <i>p3'IT-HXGPRT</i> ) |
| <i>TgPEPCK<sub>net</sub></i> -3'IT-COS-HA-R1 ( <i>Eco</i> RI) | CTCAT <u>CGAATTCCTAAGCGTAATCTGGAACATCGTATGGTAGGAAGGGAGACTGTGGGTG</u>       |                                                                        |
| <i>TgPEPCK<sub>net</sub></i> -3'IT-Scr-F1                     | TGGTGATTTTCGGTACATGC                                                       | Screening of 3' crossover at the gene locus ( <i>pDrive</i> )          |
| <i>TgPEPCK<sub>net</sub></i> -3'IT-Scr-R1                     | CTGATCGGCTTTGTAGACTTCTC                                                    |                                                                        |
| <b>TgPEPCK<sub>mt</sub></b>                                   |                                                                            |                                                                        |
| <i>TgPEPCK<sub>mt</sub></i> -ORF-F1 ( <i>Bsp</i> HI)          | CTCAT <u>TCATGAATTATACAATGCACCTTGCTCTCGCA</u>                              | Tetracycline-regulated expression<br>( <i>pTET07SAG1-UPKO</i> )        |
| <i>TgPEPCK<sub>mt</sub></i> -ORF-HA-R1 ( <i>Pac</i> I)        | CTCATCTTAATTA <u>ACTAAGCGTAATCTGGAACATCGTATGGGTAAAAAACC</u> GACAGCAGC      |                                                                        |
| <i>TgPEPCK<sub>mt</sub></i> -KO-5'UTR-F1 ( <i>Apa</i> I)      | CTCAT <u>CGGGCCCGGCAAGGAATGATACAAAAGTGA</u>                                | Cloning of 5'UTR for the gene knockout ( <i>pKO-DHFR-TS</i> )          |
| <i>TgPEPCK<sub>mt</sub></i> -KO-5'UTR-R1 ( <i>Apa</i> I)      | CTCAT <u>CGGGCCCT</u> TTATGTAGACAACCACCCCG                                 |                                                                        |
| <i>TgPEPCK<sub>mt</sub></i> -KO-3'UTR-F1 ( <i>Spe</i> I)      | CTCAT <u>CACTAGTGCACCTCGAAAAGTCATCGTG</u>                                  | Cloning of 3'UTR for the gene knockout ( <i>pKO-DHFR-TS</i> )          |
| <i>TgPEPCK<sub>mt</sub></i> -KO-3'UTR-R1 ( <i>Not</i> I)      | CTCAT <u>CGCGGCCGCA</u> ACTGGCCAGGTAAGGCAG                                 |                                                                        |
| <i>TgPEPCK<sub>mt</sub></i> -KO-5'Scr-F1                      | GTGATGCATGCACCTTCTGCT                                                      | Screening of 5' recombination at the gene locus ( <i>pDrive</i> )      |
| <i>TgPEPCK<sub>mt</sub></i> -KO-5'Scr-R1                      | ATCGAGTAAGCACACTACTCCACG                                                   |                                                                        |
| <i>TgPEPCK<sub>mt</sub></i> -KO-3'Scr-F1                      | GGGATCAGGGAGAGTGCC                                                         | Screening of 3' recombination at the gene locus ( <i>pDrive</i> )      |
| <i>TgPEPCK<sub>mt</sub></i> -KO-3'Scr-R1                      | GGTGCCCTAACATCAACGTC                                                       |                                                                        |
| <i>TgPEPCK<sub>mt</sub></i> -3'IT-COS-F1 ( <i>Xcm</i> I)      | CTCAT <u>CCCACCGGTCACCTGGGGTCTGATTTAGTGGCGCTAAG</u>                        | Cloning of crossover sequence for 3'HA tagging ( <i>p3'IT-HXGPRT</i> ) |
| <i>TgPEPCK<sub>mt</sub></i> -3'IT-COS-HA-R1 ( <i>Eco</i> RI)  | CTCAT <u>CGAATTCCTAAGCGTAATCTGGAACATCGTATGGTAAAAAACC</u> GACAGCAGC         |                                                                        |
| <i>TgPEPCK<sub>mt</sub></i> -3'IT-Scr-F1                      | GAATTACATGCGCCACG                                                          | Screening of 3' crossover at the gene locus ( <i>pDrive</i> )          |
| <i>TgPEPCK<sub>mt</sub></i> -3'IT-Scr-R1                      | CTGATCGGCTTTGTAGACTTCTC                                                    |                                                                        |

## A

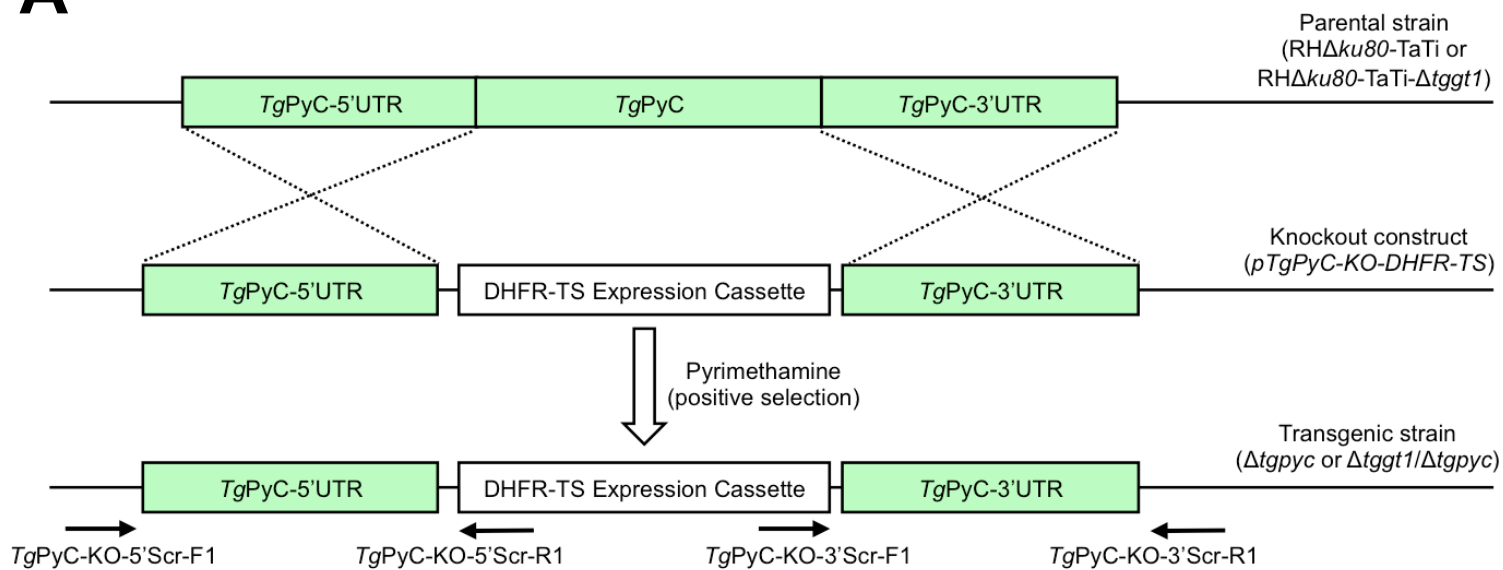

## B

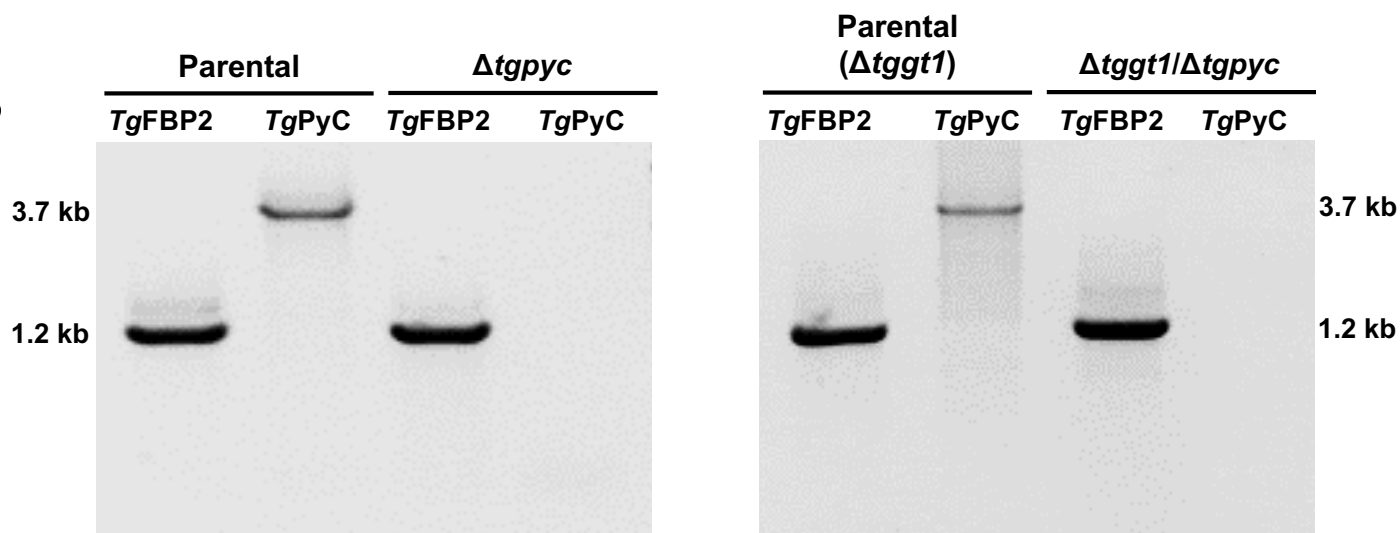

## C

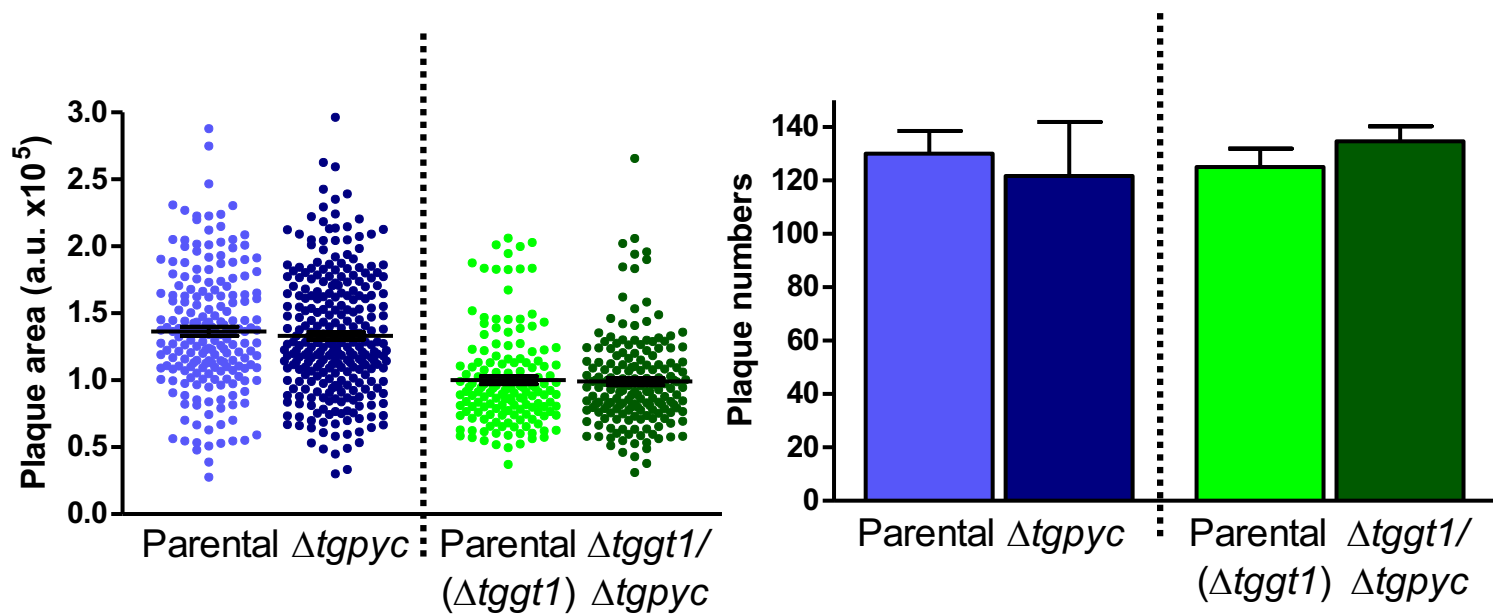

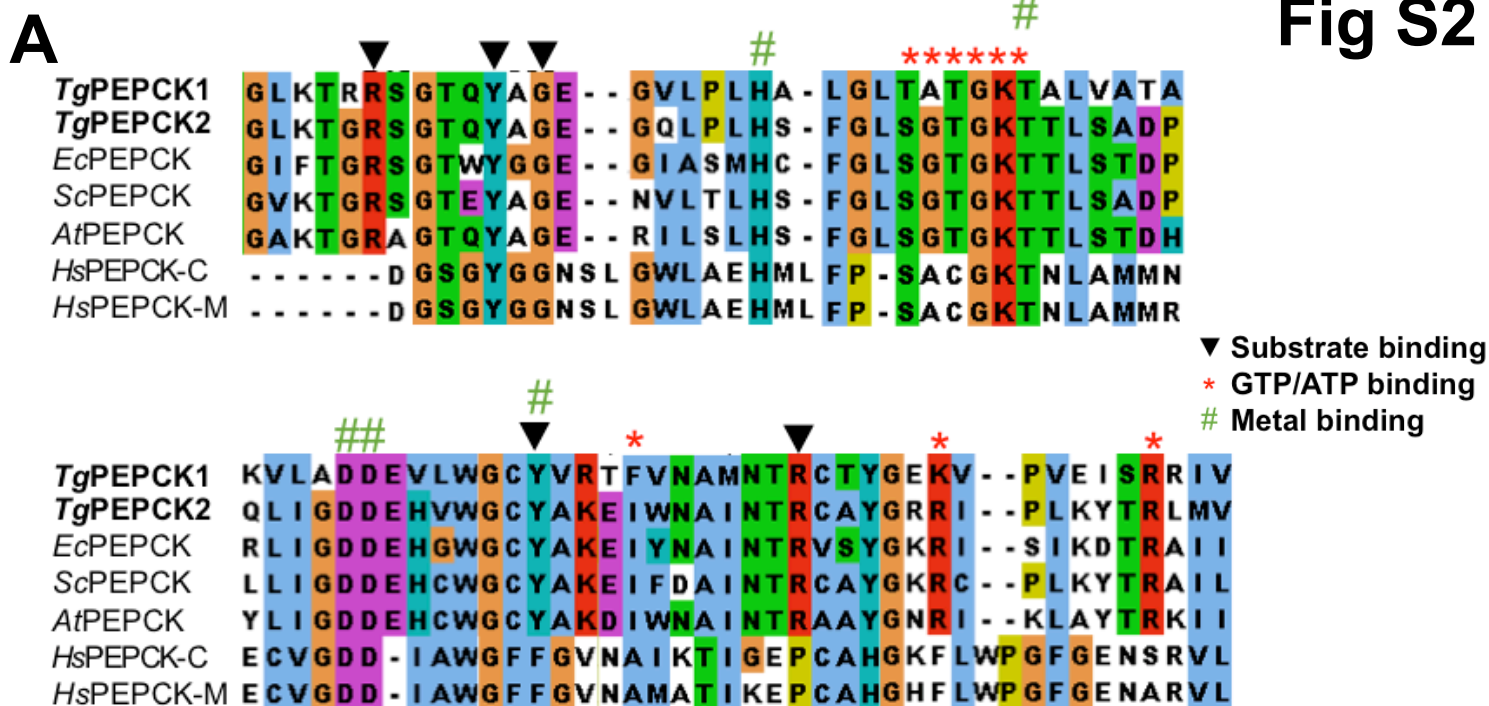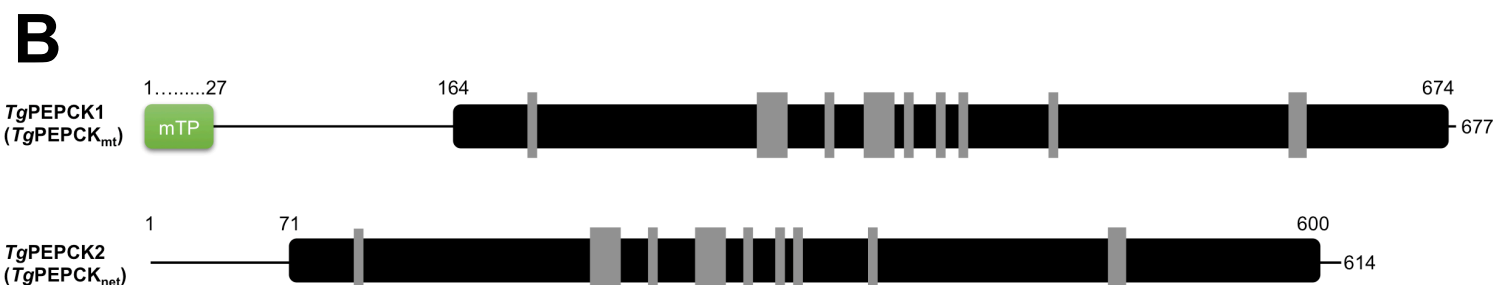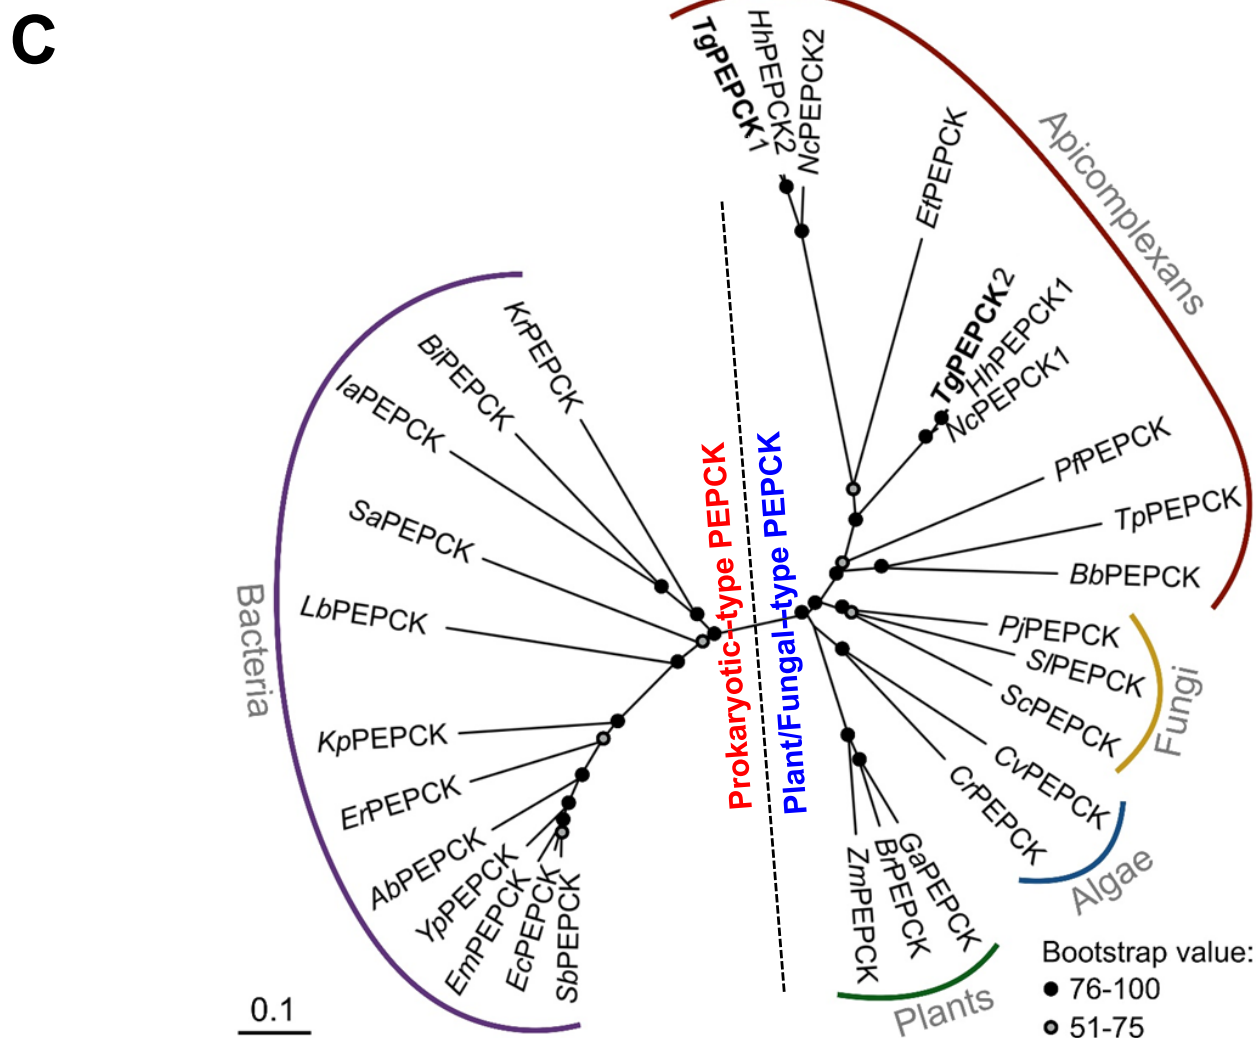

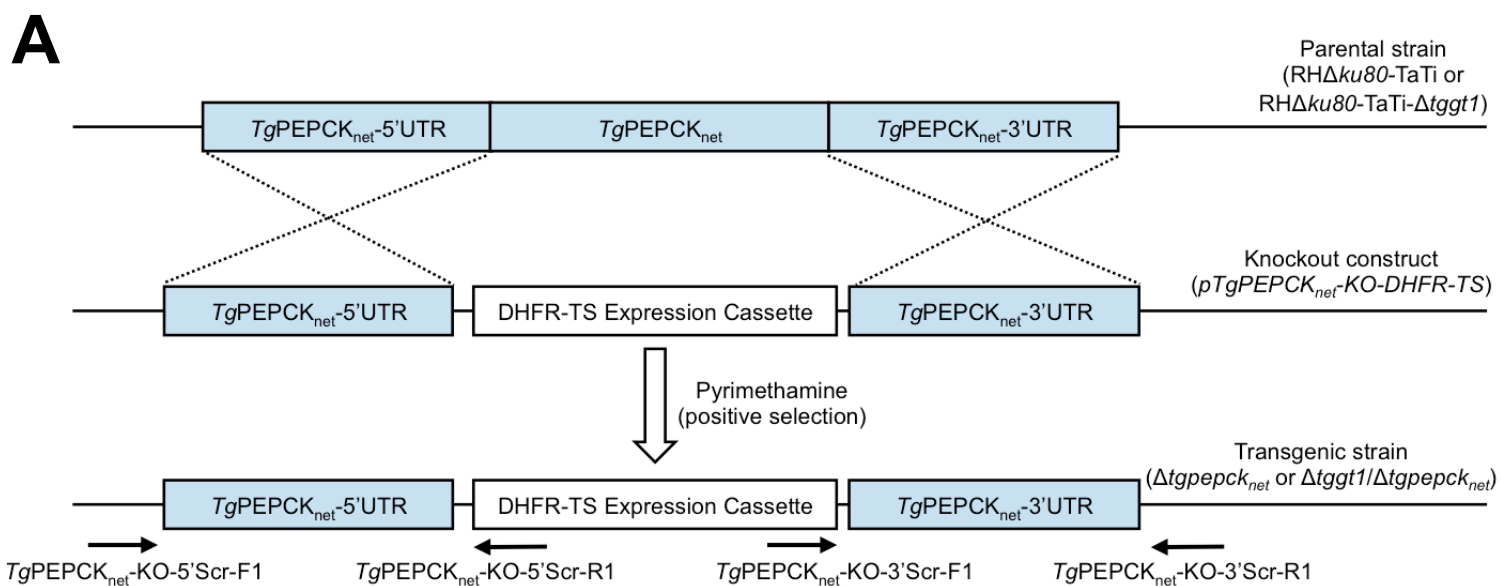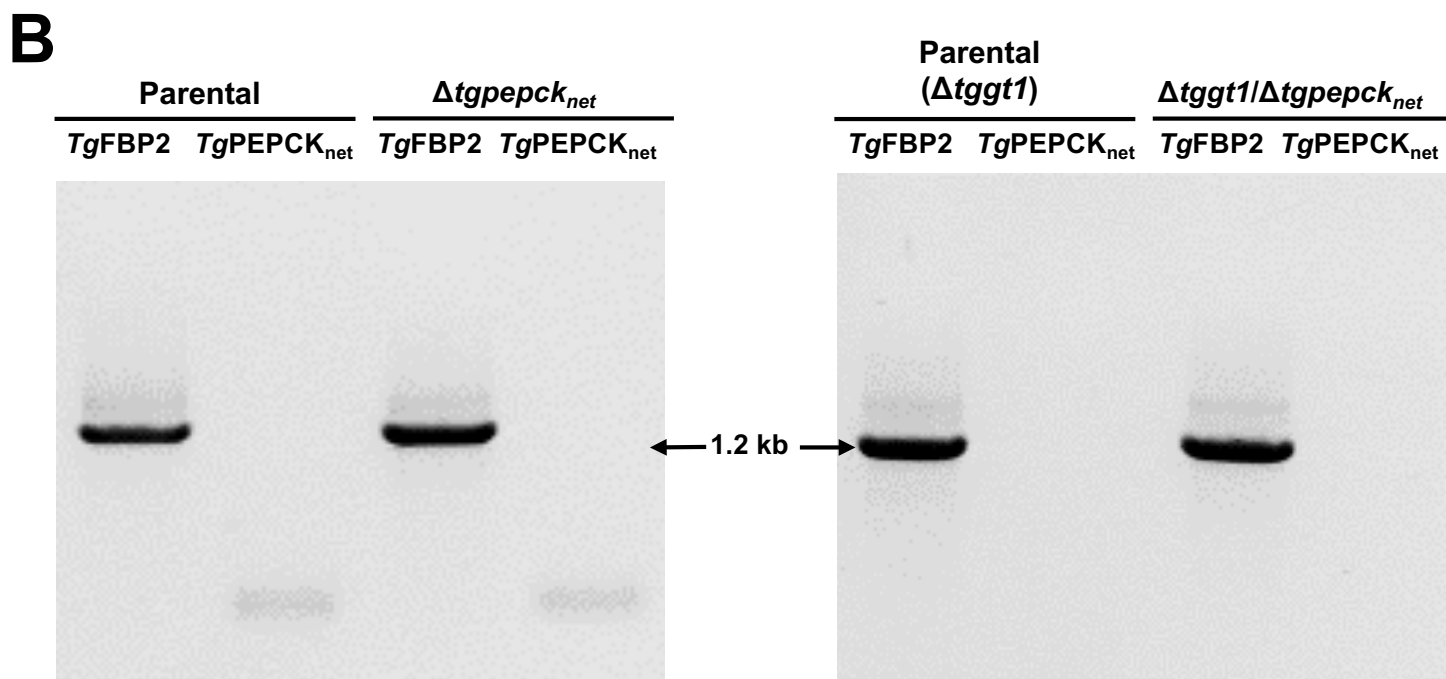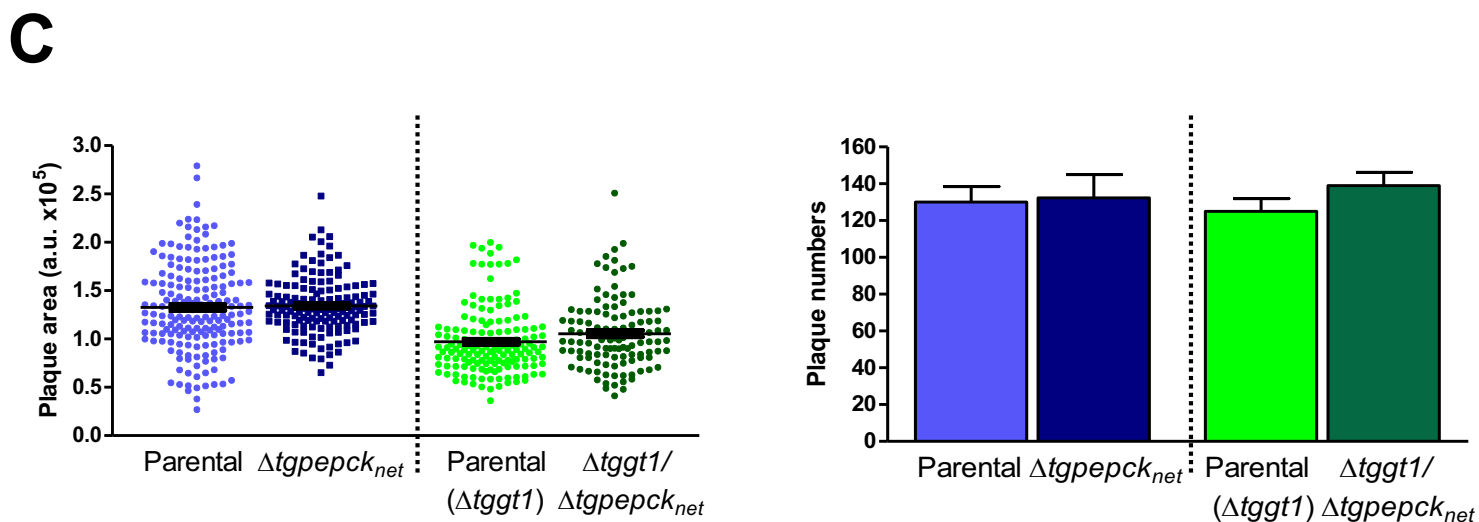

A

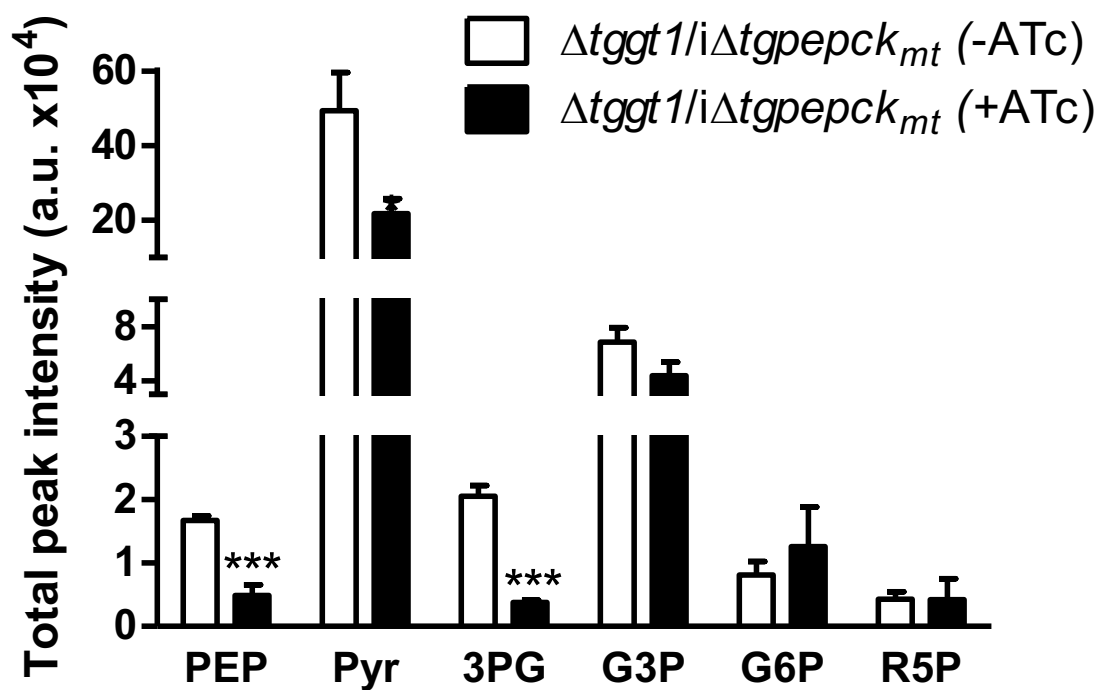

B

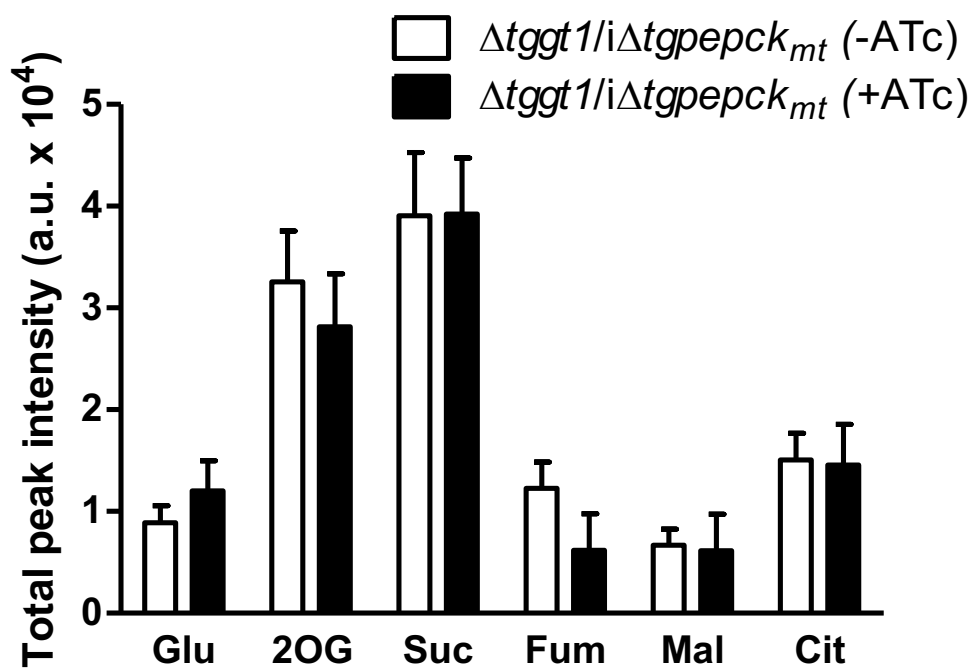

Fig S5

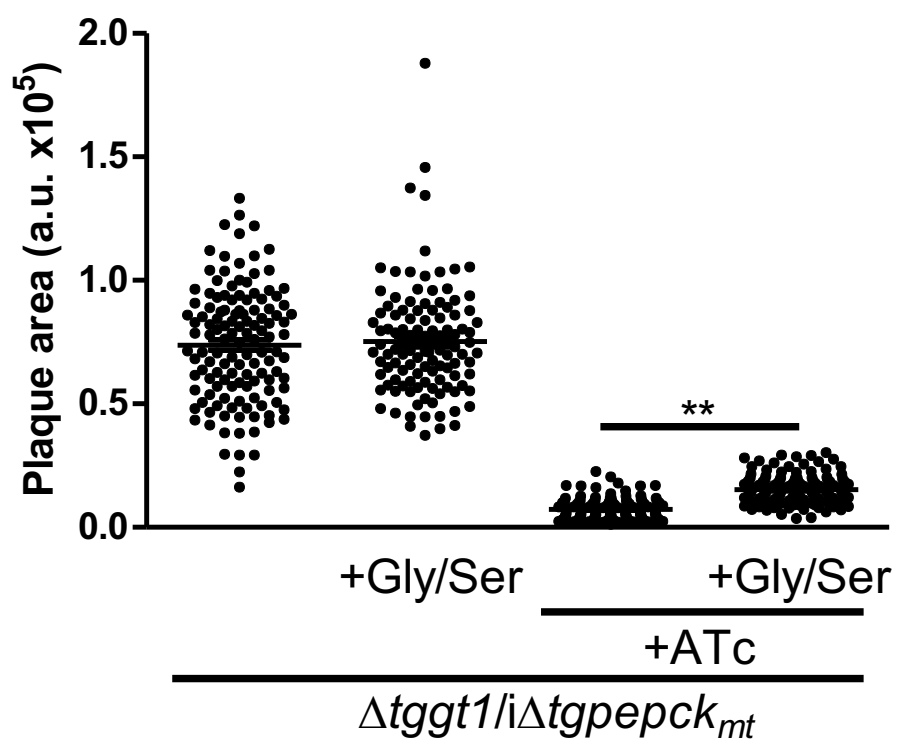

Supplement: 10.1074_M117.802702_jbc.M117.802702-1.pdf [file 10.1074_M117.802702_jbc.M117.802702-1.pdf]
